# Supplementary material for: Structural peculiarities of keto-carotenoids in water-soluble proteins revealed by simulation of linear absorption
Source: Royal Society of Chemistry journal article supplement (doi:10.1039/c9cp04508b), 2019-01-01
Supplement: c9cp04508b1.pdf [file c9cp04508b1.pdf]

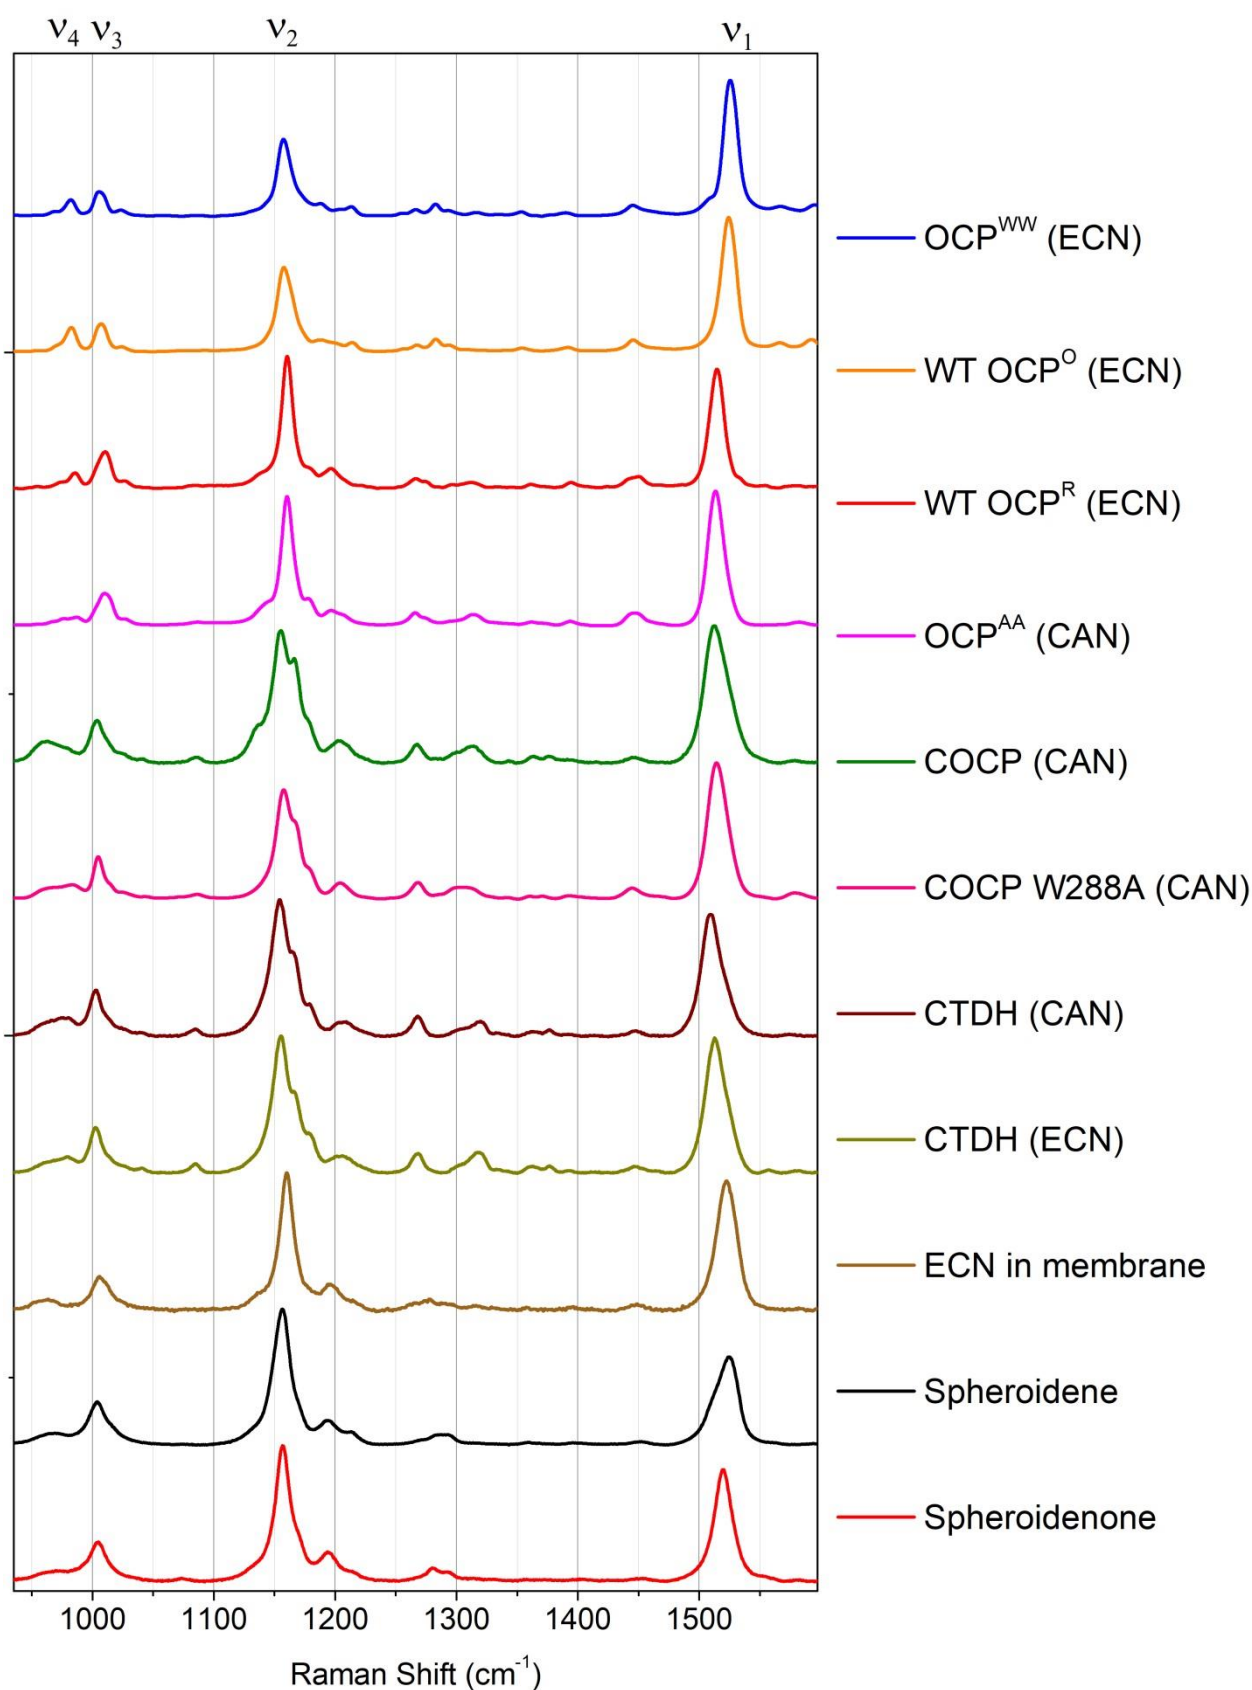

**Supplementary Figure 1.** Resonance (532 nm) Raman spectra of ECN and CAN in different OCP-like proteins and environments. Also, the corresponding spectra of spheroidene and spheroidenone are shown for comparison.



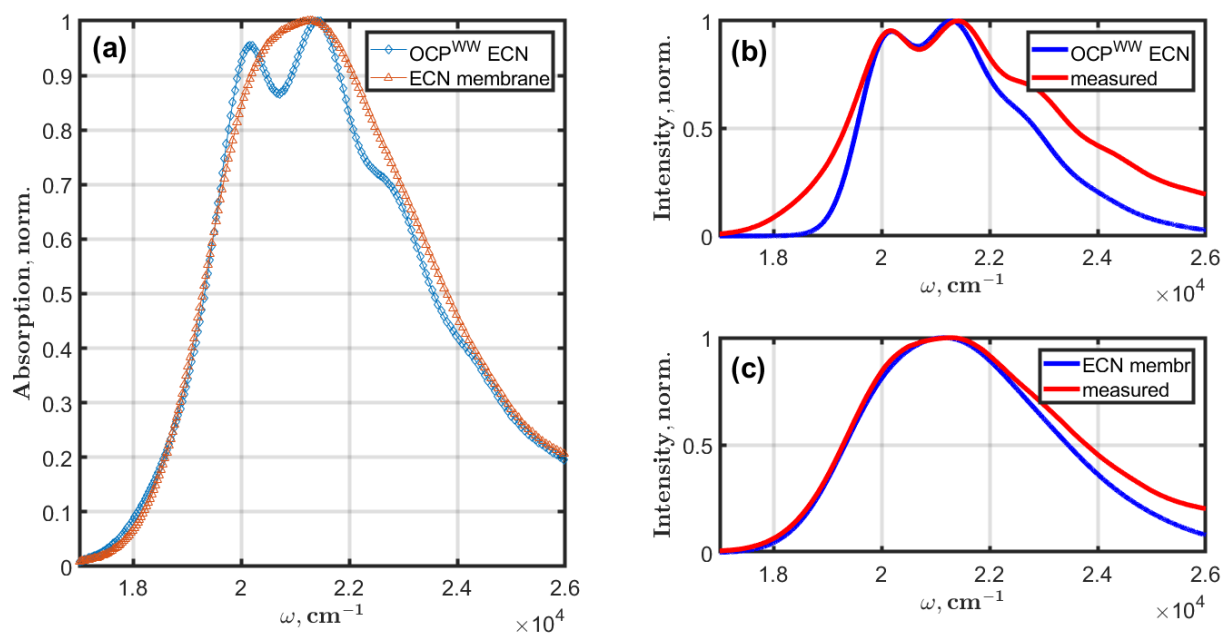

**Supplementary Figure 2.** Measured (A) and simulated (B, C) absorption of OCP<sup>WW</sup> (ECN) and ECN in membrane at RT, respectively.

**Supplementary Table 1.** Result of the (TD)DFT/TDA/D3/6-311G\*\* calculation of the hECH S0-S2 excitation energy done with different functionals and for different conformations. «Planar» conformation correspond to all-trans hECH with exact planar dihedral angles across the  $\pi$ -conjugated system. «Dihedral 90» conformations correspond to the disrupted  $\pi$ -conjugated system with dihedral angle equal to 90 degree (dihedral angle labeling as in Fig 3).

| Functional                           | E(S0-S2),<br>Planar, cm <sup>-1</sup> | E(S0-S2), Dihedral 90, cm-1 |         |         |         |         |
|--------------------------------------|---------------------------------------|-----------------------------|---------|---------|---------|---------|
|                                      |                                       | 3                           | 5       | 7       | 9       | 11      |
| B3LYP                                | 17727.0                               | 19710.3                     | 21232.1 | 22120.9 | 23520.5 | 24964.4 |
| CAM-<br>B3LYP                        | 20800.5                               | 22293.2                     | 23266.2 | 24509.5 | 25857.3 | 27110.7 |
| WB97X                                | 22011.6                               | 23371.2                     | 24288.1 | 25478.7 | 26811.4 | 28401.1 |
| M06-2x                               | 19797.4                               | 22026.7                     | 23019.5 | 24286.3 | 25632.2 | 26921.8 |
| RI-<br>wB2PLYP<br><br>def2-<br>TZVPP | 22143.8                               | 24644.5                     | 25547.3 | 26731.9 | 28100.7 | 29381.8 |
